# Supplementary material
Source: MDPI journal article supplement (https://www.mdpi.com/2077-0472/11/12/1273)
Supplement: s1 [file s1]

**Supplementary Table S1.** Antagonistic and plant growth promoting traits in rhizosphere strains isolated from various plant roots.

| Strain ID/<br>Characteristic | RS-01  | RS-06  | RS-05  | RS-06             | RS-09             | RS-10             | RS-17 | RS-34                    | RS-49                    | RS-71  | RS-94 | RS-96 |
|------------------------------|--------|--------|--------|-------------------|-------------------|-------------------|-------|--------------------------|--------------------------|--------|-------|-------|
| Plant Rhizosphere            | Peanut | Peanut | Peanut | <i>C.dactylon</i> | <i>C.dactylon</i> | <i>C.dactylon</i> | Maize | Grazing grass consortium | Grazing grass consortium | Grapes | Wheat | Wheat |
| <i>E. coli</i>               | –      | –      | –      | +                 | +                 | +                 | +     | +                        | –                        | +      | +     | +     |
| <i>S. aureus</i>             | +      | +      | +      | –                 | +                 | +                 | +     | +                        | +                        | +      | +     | –     |
| <i>S. pneumoniae</i>         | +      | +      | –      | –                 | +                 | +                 | +     | +                        | +                        | –      | +     | –     |
| <i>S. typhimurium</i>        | –      | –      | –      | +                 | –                 | +                 | –     | –                        | –                        | –      | +     | –     |
| <i>L. monocytogenes</i>      | +      | –      | +      | +                 | –                 | +                 | +     | +                        | +                        | –      | –     | –     |
| <i>P. syringae</i>           | –      | –      | –      | +                 | +                 | +                 | +     | +                        | –                        | –      | +     | –     |
| <i>K. pneumoniae</i>         | –      | –      | –      | –                 | +                 | +                 | –     | –                        | +                        | –      | –     | –     |
| <i>P. aeruginosa</i>         | –      | +      | –      | +                 | –                 | +                 | –     | –                        | –                        | –      | –     | +     |
| <i>Siderophore</i>           | ND     | ND     | +      | +                 | –                 | +                 | ND    | +                        | ND                       | ND     | +     | ND    |
| <i>Phosphate</i>             | ND     | ND     | –      | +                 | –                 | +                 | ND    | +                        | ND                       | ND     | –     | ND    |
| <i>Protease</i>              | –      | +      | +      | +                 | +                 | +                 | +     | +                        | –                        | –      | –     | ND    |
| <i>cellulase</i>             | ND     | –      | –      | –                 | +                 | +                 | –     | –                        | –                        | ND     | –     | ND    |
| <i>Biofilm</i>               | ND     | ND     | ND     | +                 | ND                | +                 | ND    | +                        | ND                       | ND     | ND    | ND    |
